# Supplementary material for: Cellulose-based polyelectrolyte complex nanoparticles for DNA vaccine delivery
Source: Royal Society of Chemistry journal article supplement (doi:10.1039/c4bm00202d), 2014-07-07
Supplement: c4bm00202d1.pdf [file c4bm00202d1.pdf]

## 1 Supporting Materials

2 This information is supported to prove that the green fluorescent nuclei in **Fig. 7** are  
3 caused by the EGFP expression, instead of by the bleed-through from blue DAPI.

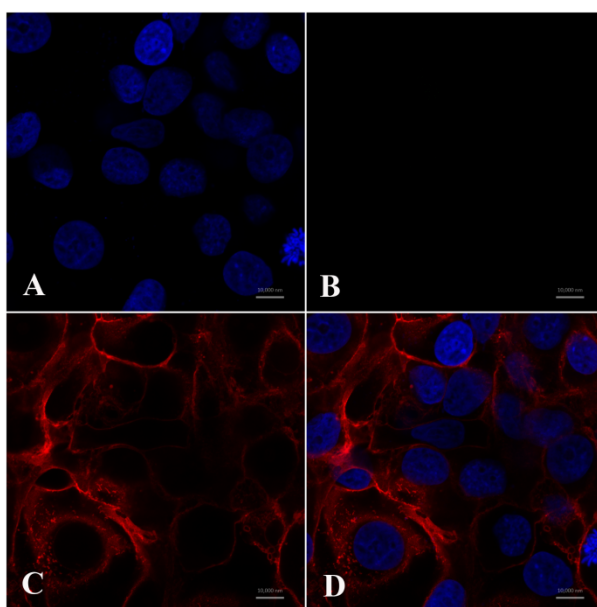

4  
5 Confocal microscopic images of the untransfected COS-7 cells. (a) Fluorescence blue  
6 channel of cell nuclei, (b) fluorescence green channel of green fluorescent protein  
7 expression, (c) fluorescence red channel of cell membranes, and (d) overlapped  
8 image. Scale bars 10  $\mu\text{m}$ .

9
